# Supplementary material for: Have bird distributions shifted along an elevational gradient on a tropical mountain?
Source: PubMed Central journal article supplement (PMC5723601; doi:10.1002/ece3.3520), 2017-10-20
Supplement: ECE3-7-9914-s001.pdf [file ECE3-7-9914-s001.pdf]

**A**

1- *Coccyzus vieillot*

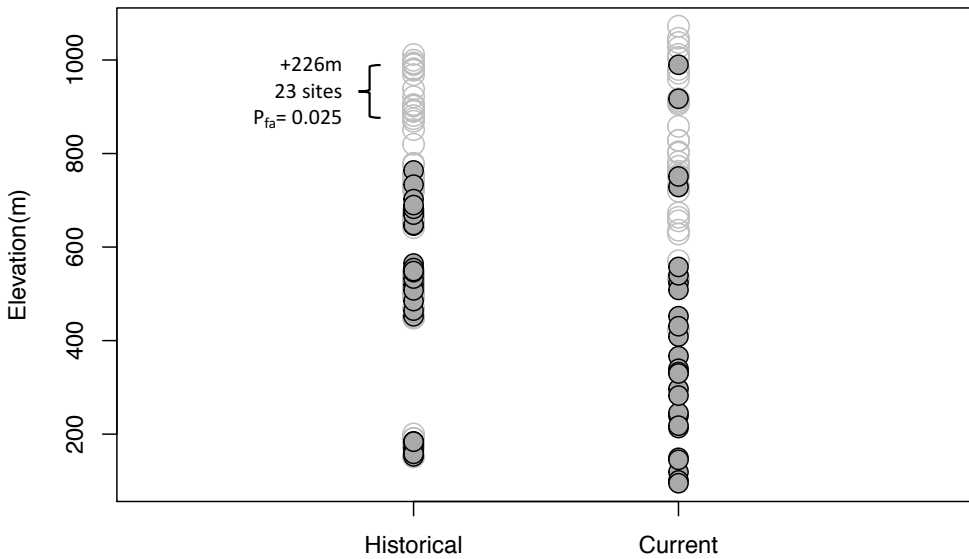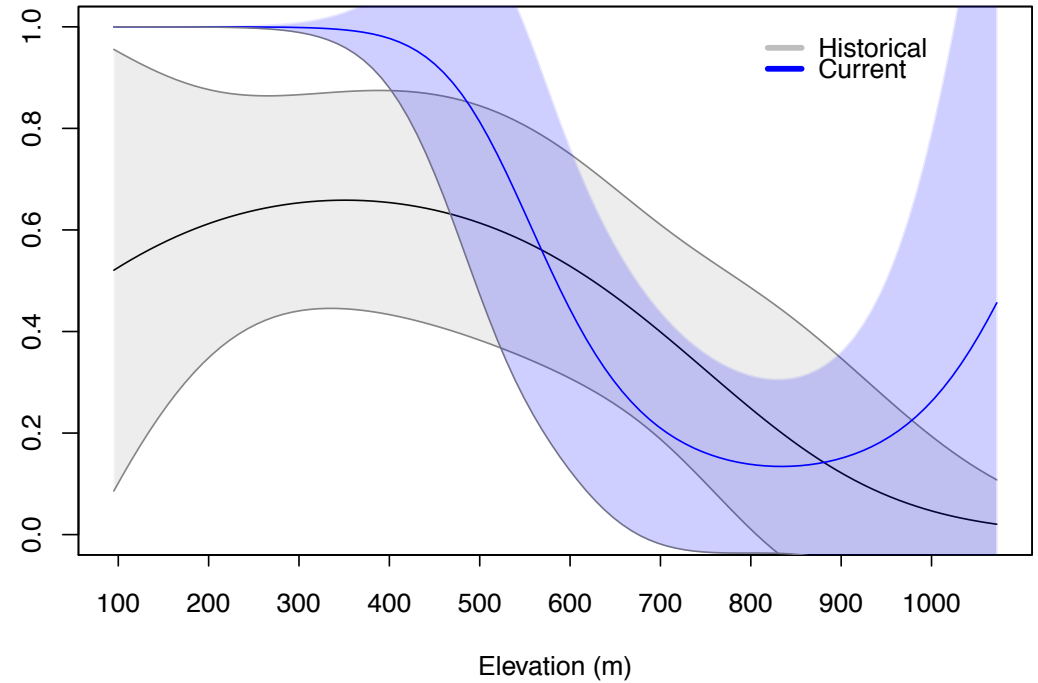

Optimal historical= 351m  
 Optimal current= 95 – 331m

| <b>Occupancy models</b>            | <b>Cumulative AIC weight</b> |
|------------------------------------|------------------------------|
| Constant                           | 0                            |
| Elev                               | 0.07                         |
| Elev+Elev <sup>2</sup>             | 0.02                         |
| Era                                | 0                            |
| Era+Elev                           | 0.04                         |
| Era+Elev+Elev <sup>2</sup>         | 0.02                         |
| Era*Elev                           | 0.15                         |
| <b>Era*(Elev+Elev<sup>2</sup>)</b> | <b>0.67</b>                  |

**B***2 - Vireo altiloquus*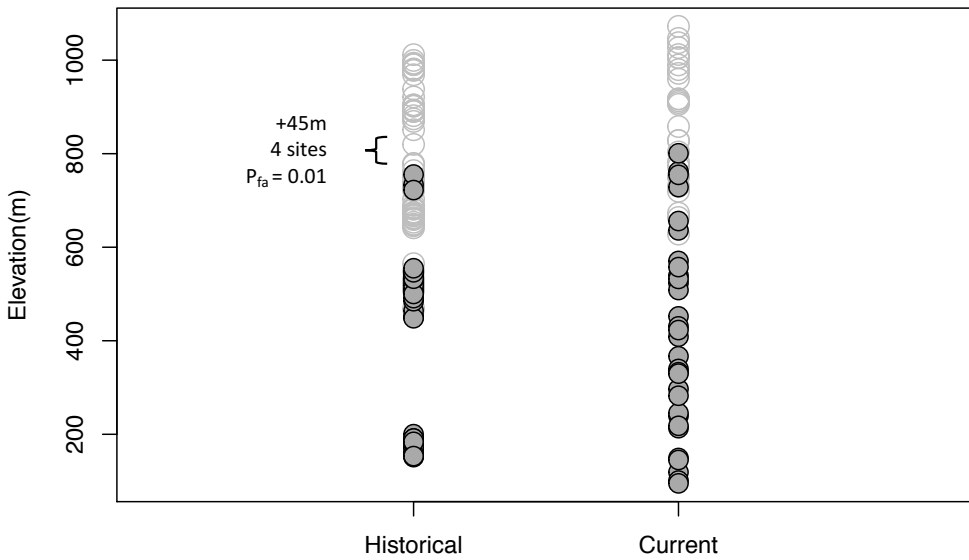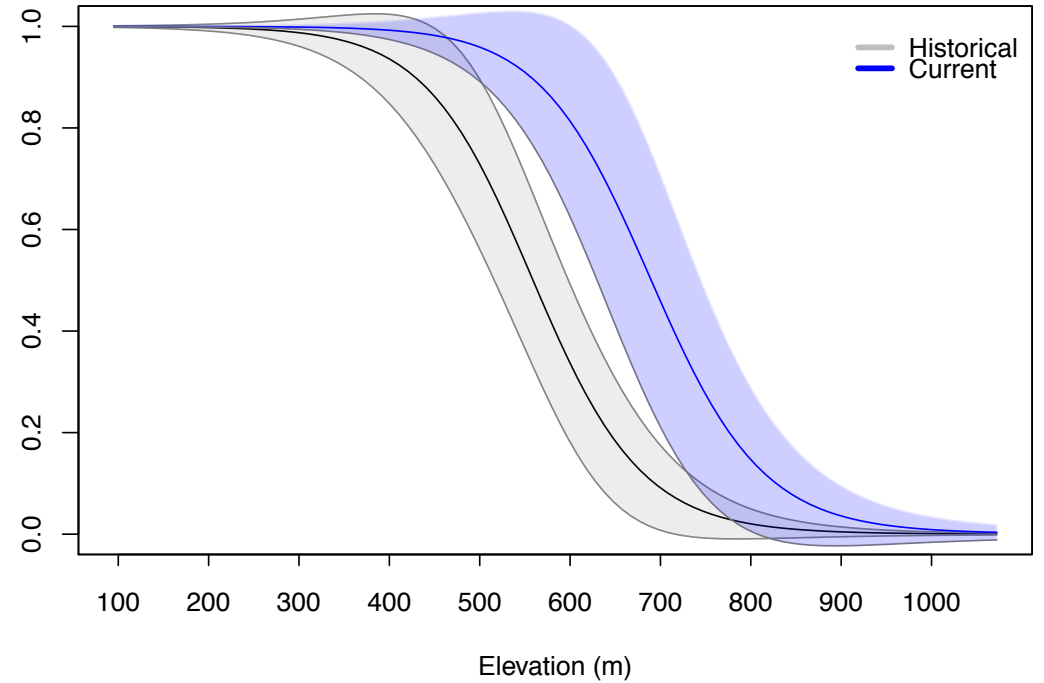

Optimal historical= 95 - 243 m  
Optimal modern= 95 - 371m

| <b>Occupancy models</b>       | <b>Cumulative AIC weight</b> |
|-------------------------------|------------------------------|
| Constant                      | 0                            |
| Elev                          | 0.01                         |
| Elev+Elev <sup>2</sup>        | 0.00                         |
| Era                           | 0                            |
| <b>Era+Elev</b>               | <b>0.53</b>                  |
| Era+Elev+Elev <sup>2</sup>    | 0.23                         |
| Era*Elev                      | 0.19                         |
| Era*(Elev+Elev <sup>2</sup> ) | 0.04                         |

C

3 – *Setophaga angelae*

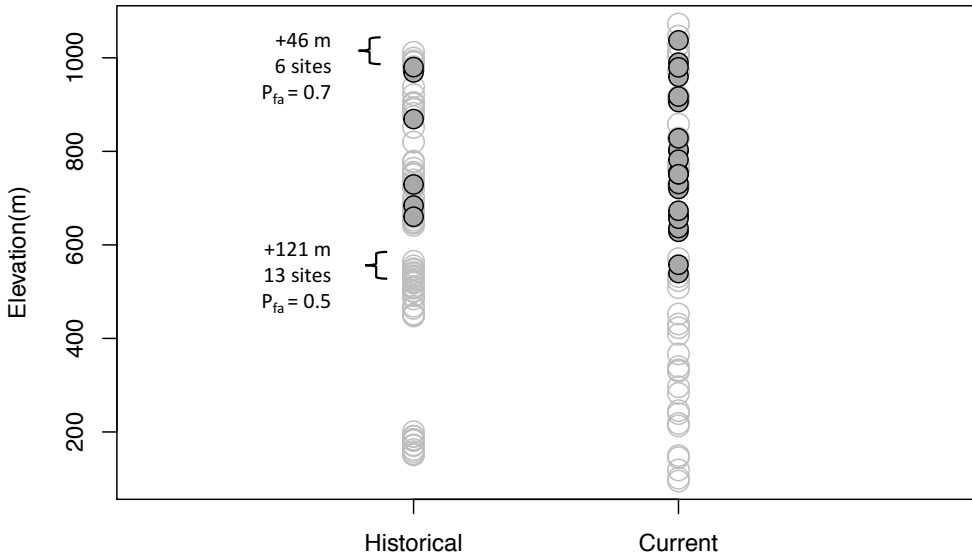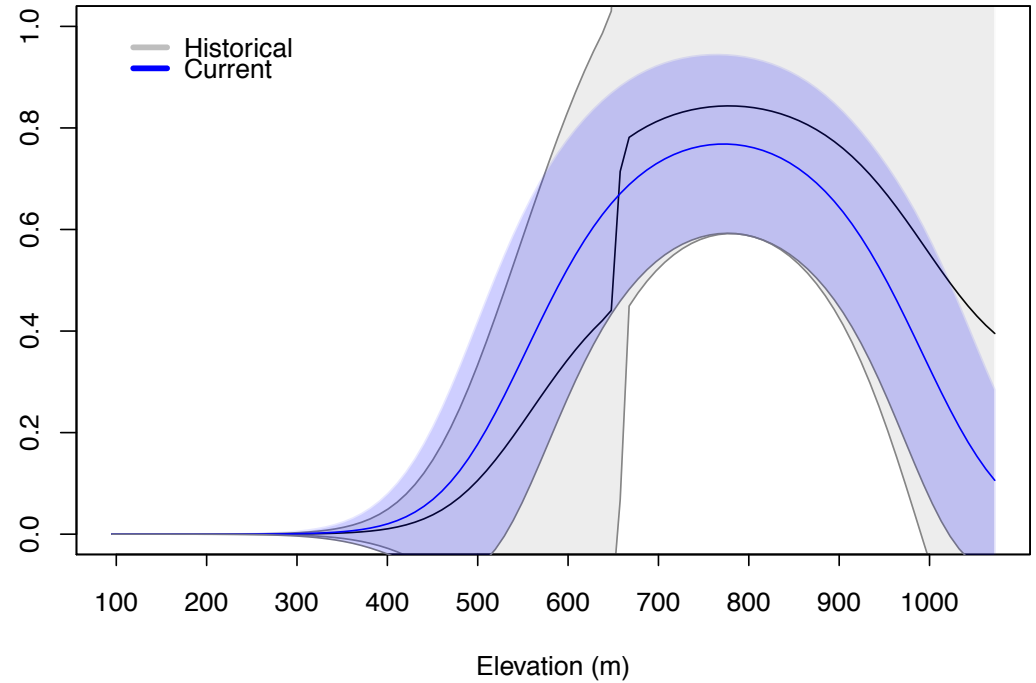

| <u>Occupancy models</u>       | <u>Cumulative AIC weight</u> |
|-------------------------------|------------------------------|
| Constant                      | 0                            |
| Elev                          | 0                            |
| <b>Elev+Elev<sup>2</sup></b>  | <b>0.55</b>                  |
| Era                           | 0                            |
| Era+Elev                      | 0.00                         |
| Era+Elev+Elev <sup>2</sup>    | 0.20                         |
| Era*Elev                      | 0.00                         |
| Era*(Elev+Elev <sup>2</sup> ) | 0.25                         |

Optimal historical= 736 - 815 m  
 Optimal modern= 756 - 785 m

D

4 – *Megascops nudipes*

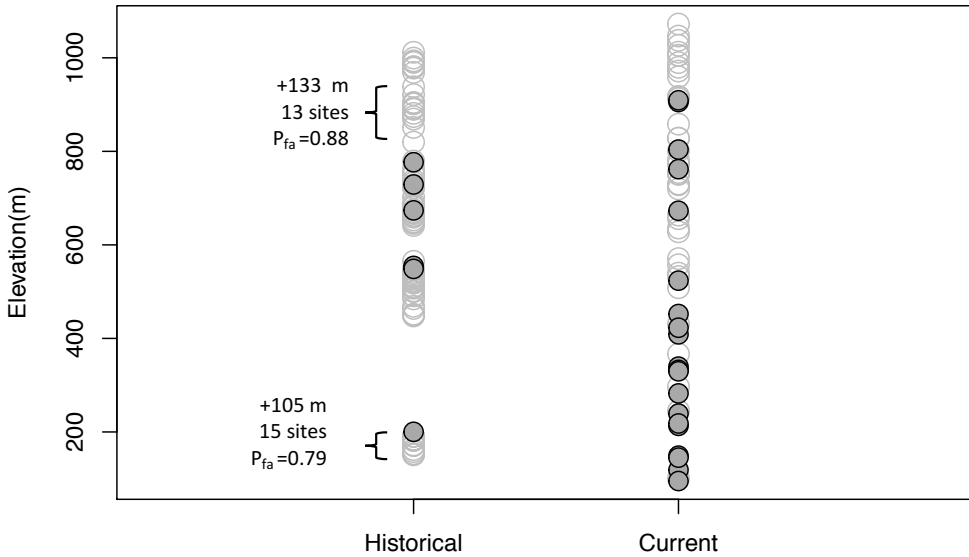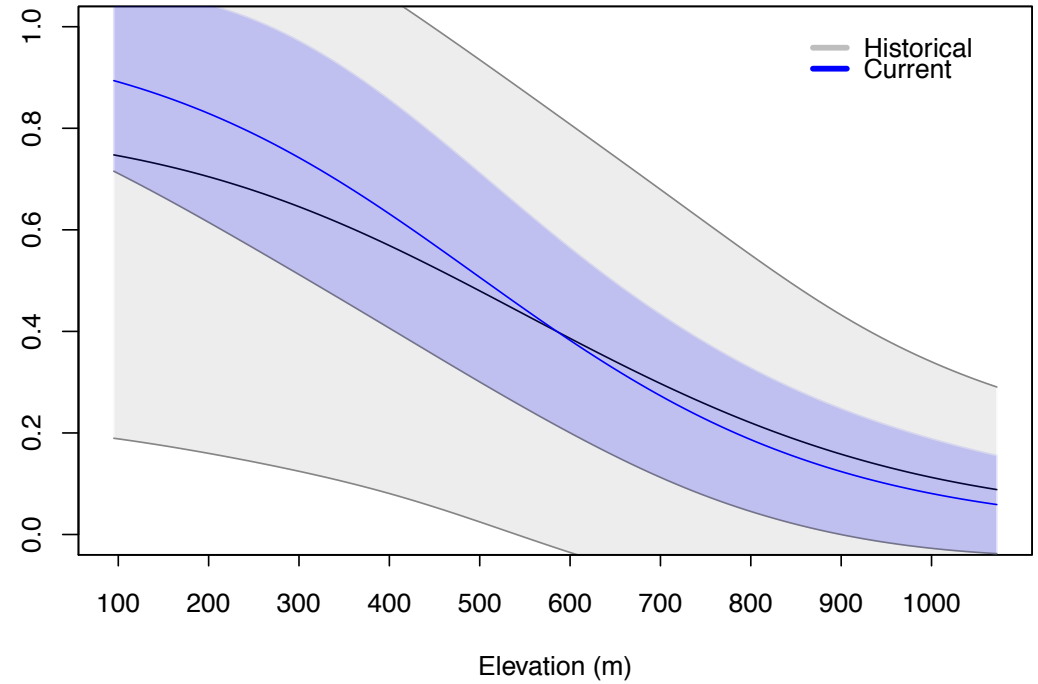

Optimal historical= 95 m  
Optimal modern= 95 m

| <u>Occupancy models</u>       | <u>Cumulative AIC weight</u> |
|-------------------------------|------------------------------|
| Constant                      | 0                            |
| Elev                          | 0.25                         |
| Elev+Elev <sup>2</sup>        | 0.09                         |
| Era                           | 0.01                         |
| Era+Elev                      | 0.20                         |
| Era+Elev+Elev <sup>2</sup>    | 0.09                         |
| <b>Era*Elev</b>               | <b>0.28</b>                  |
| Era*(Elev+Elev <sup>2</sup> ) | 0.08                         |

**E**

*5 – Geotrygon montana*

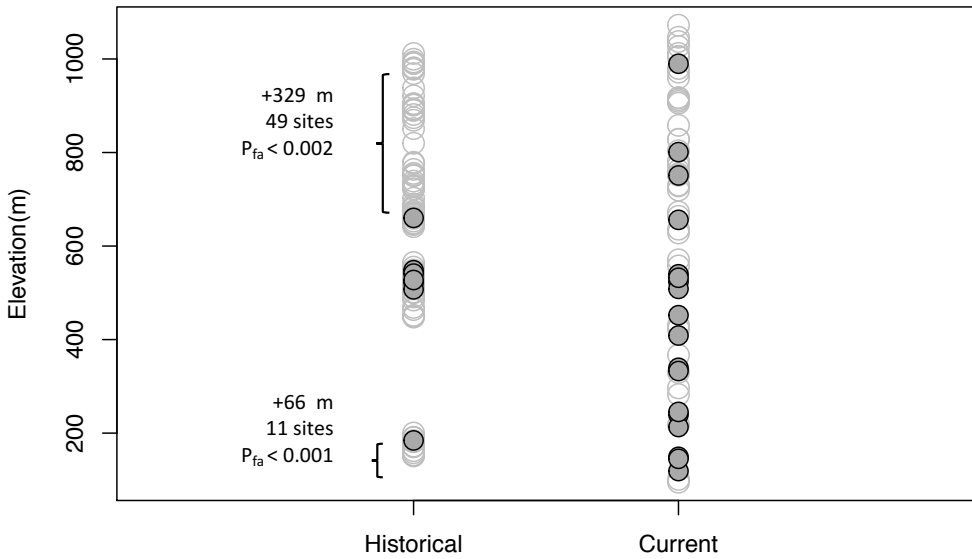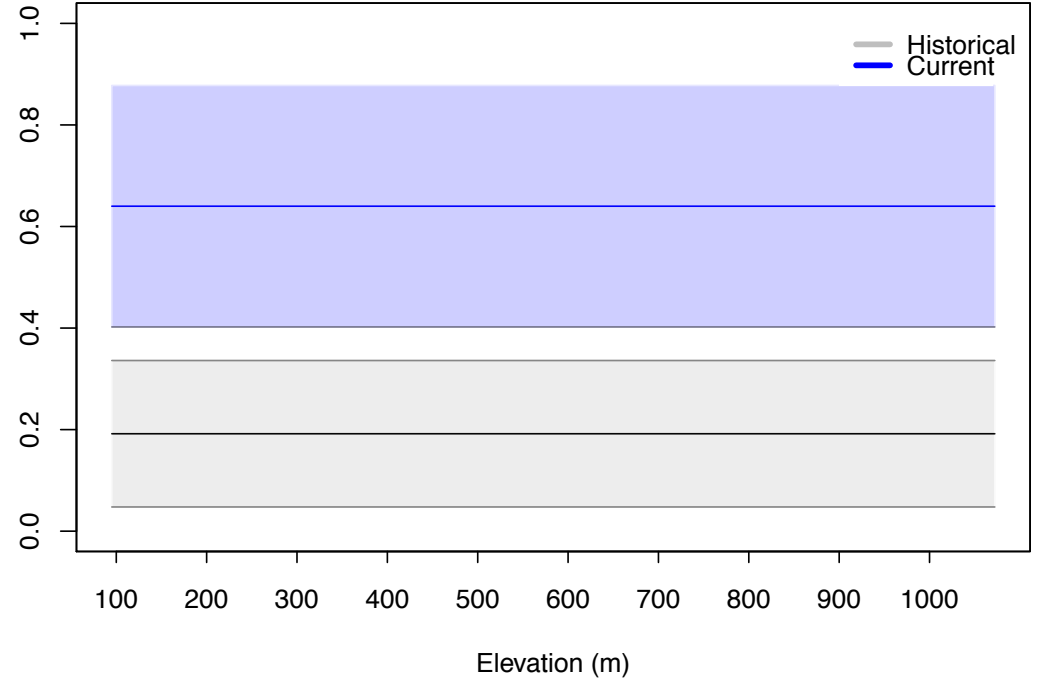

Optimal historical= 95 - 1072 m  
 Optimal modern= 95 - 1072 m

| <b>Occupancy models</b>       | <b>Cumulative AIC weight</b> |
|-------------------------------|------------------------------|
| Constant                      | 0.01                         |
| Elev                          | 0.01                         |
| Elev+Elev <sup>2</sup>        | 0.01                         |
| <b>Era</b>                    | <b>0.46</b>                  |
| Era+Elev                      | 0.18                         |
| Era+Elev+Elev <sup>2</sup>    | 0.18                         |
| Era*Elev                      | 0.09                         |
| Era*(Elev+Elev <sup>2</sup> ) | 0.07                         |

**F**

*6 – Nesospingus speculariferus*

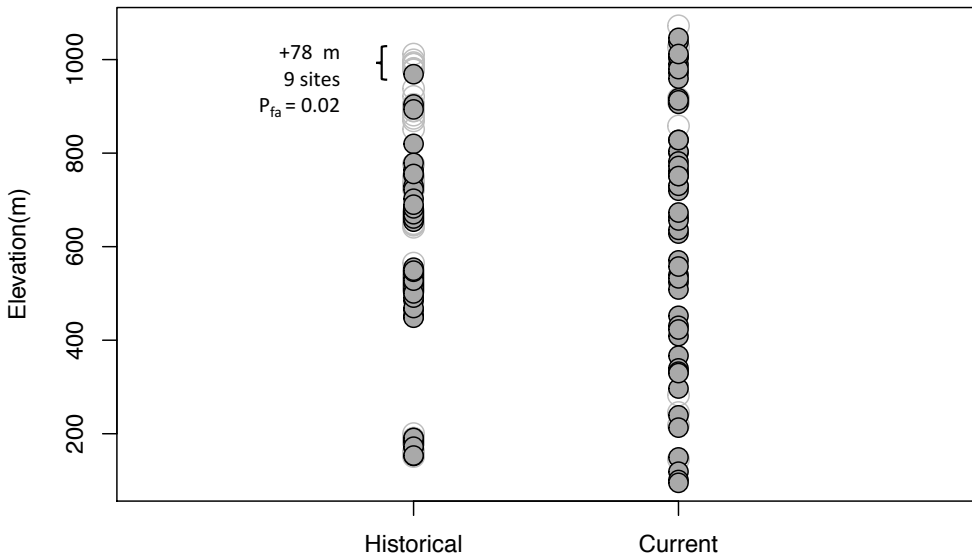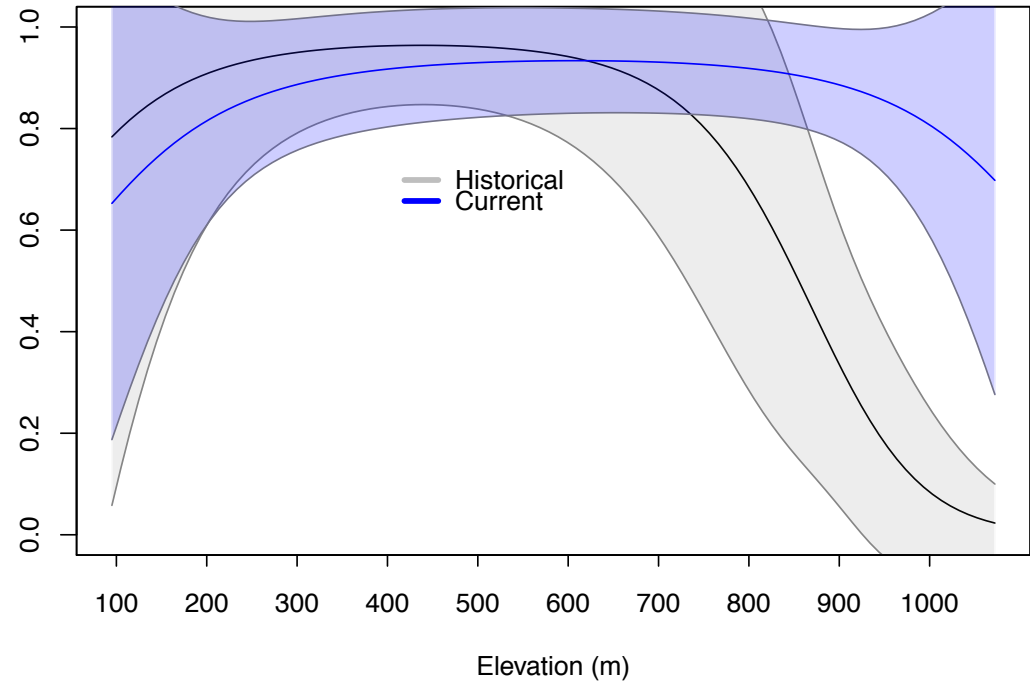

| <b>Occupancy models</b>            | <b>Cumulative AIC weight</b> |
|------------------------------------|------------------------------|
| Constant                           | 0.00                         |
| Elev                               | 0.00                         |
| Elev+Elev <sup>2</sup>             | 0.02                         |
| Era                                | 0.00                         |
| Era+Elev                           | 0.00                         |
| Era+Elev+Elev <sup>2</sup>         | 0.17                         |
| Era*Elev                           | 0.24                         |
| <b>Era*(Elev+Elev<sup>2</sup>)</b> | <b>0.57</b>                  |

Optimal historical= 331-539 m  
 Optimal modern= 963-1072 m

**G**

7 - *Myiarchus antillarum*

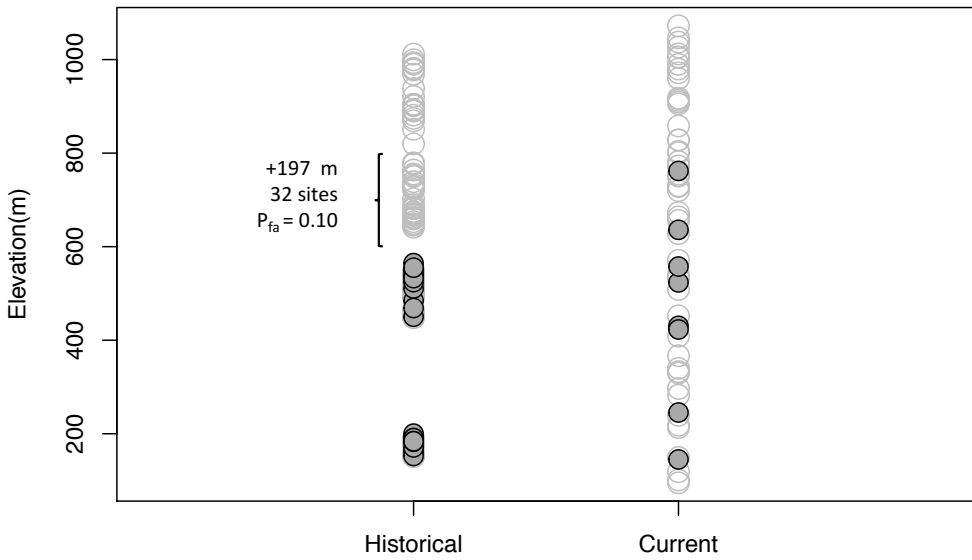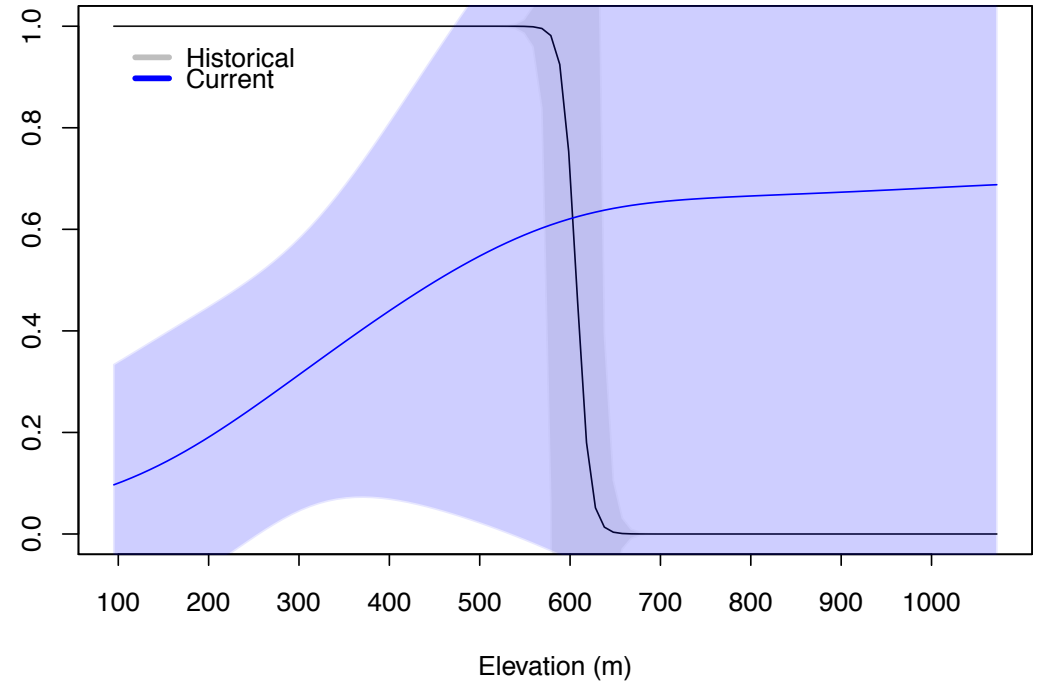

Optimal historical= 95-568 m  
Optimal modern= 1042-1072 m

| <b>Occupancy models</b>       | <b>Cumulative AIC weight</b> |
|-------------------------------|------------------------------|
| Constant                      | 0.00                         |
| Elev                          | 0.00                         |
| Elev+Elev <sup>2</sup>        | 0.00                         |
| Era                           | 0.02                         |
| Era+Elev                      | 0.09                         |
| Era+Elev+Elev <sup>2</sup>    | 0.06                         |
| <b>Era*Elev</b>               | <b>0.59</b>                  |
| Era*(Elev+Elev <sup>2</sup> ) | 0.24                         |

H

8 – *Setophaga ruticilla*

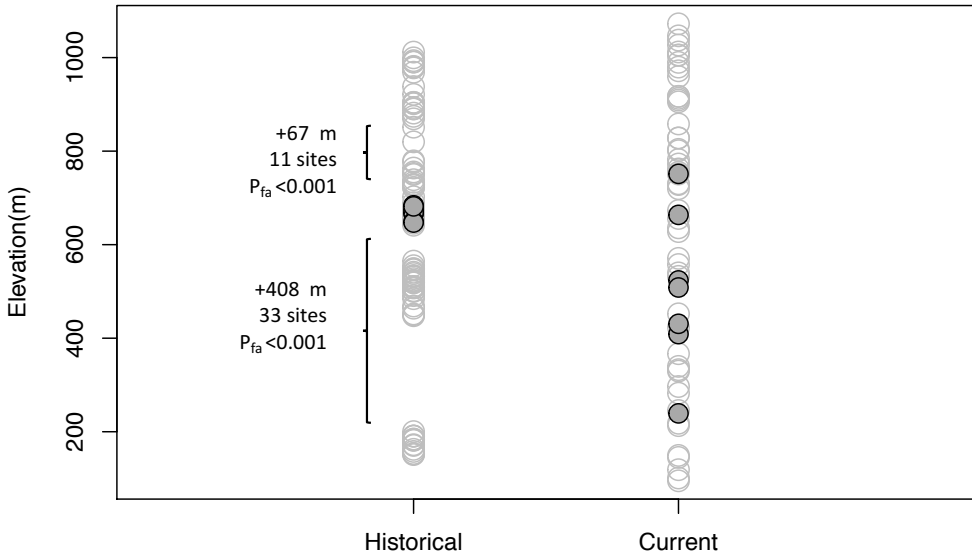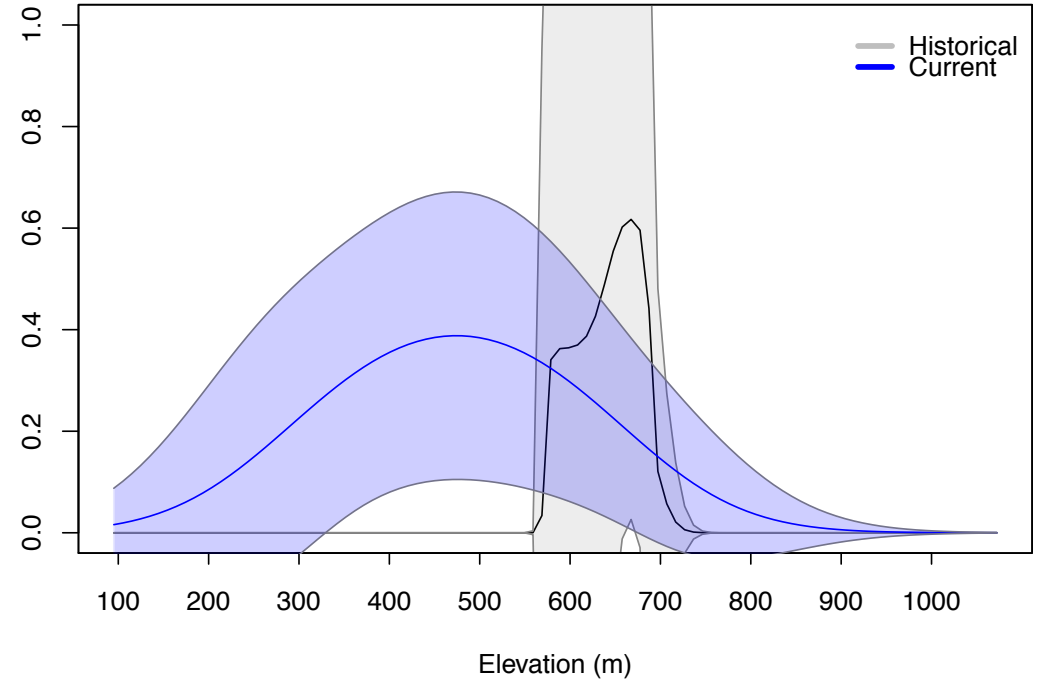

Optimal historical= 667 m  
 Optimal modern= 460-489 m

| <u>Occupancy models</u>            | <u>Cumulative AIC weight</u> |
|------------------------------------|------------------------------|
| Constant                           | 0.00                         |
| Elev                               | 0.00                         |
| Elev+Elev <sup>2</sup>             | 0.00                         |
| Era                                | 0.00                         |
| Era+Elev                           | 0.00                         |
| Era+Elev+Elev <sup>2</sup>         | 0.00                         |
| Era*Elev                           | 0.00                         |
| <b>Era*(Elev+Elev<sup>2</sup>)</b> | <b>1.00</b>                  |



## 9 – *Melanerpes portoricensis*

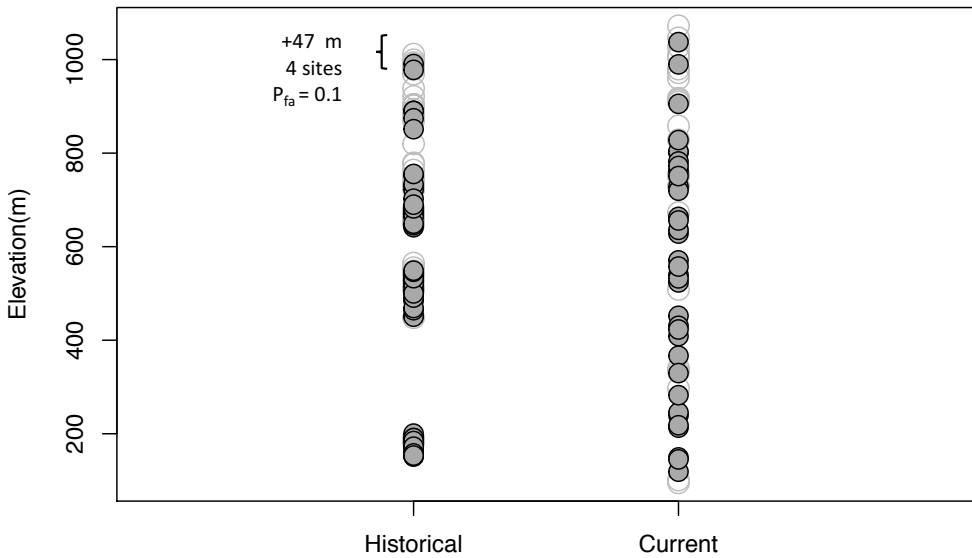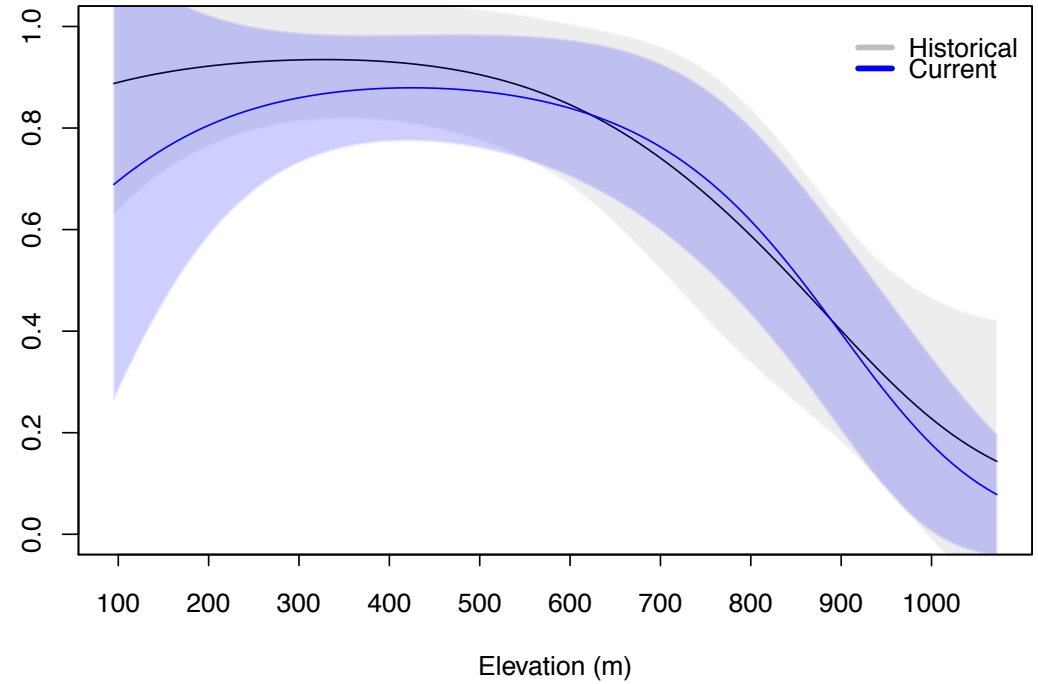

| <u>Occupancy models</u>       | <u>Cumulative AIC weight</u> |
|-------------------------------|------------------------------|
| Constant                      | 0.00                         |
| Elev                          | 0.07                         |
| <b>Elev+Elev<sup>2</sup></b>  | <b>0.35</b>                  |
| Era                           | 0.00                         |
| Era+Elev                      | 0.03                         |
| Era+Elev+Elev <sup>2</sup>    | 0.18                         |
| Era*Elev                      | 0.04                         |
| Era*(Elev+Elev <sup>2</sup> ) | 0.34                         |

Optimal historical= 223-430 m  
 Optimal modern= 371-480 m

J

10 – *Euphonia musica*

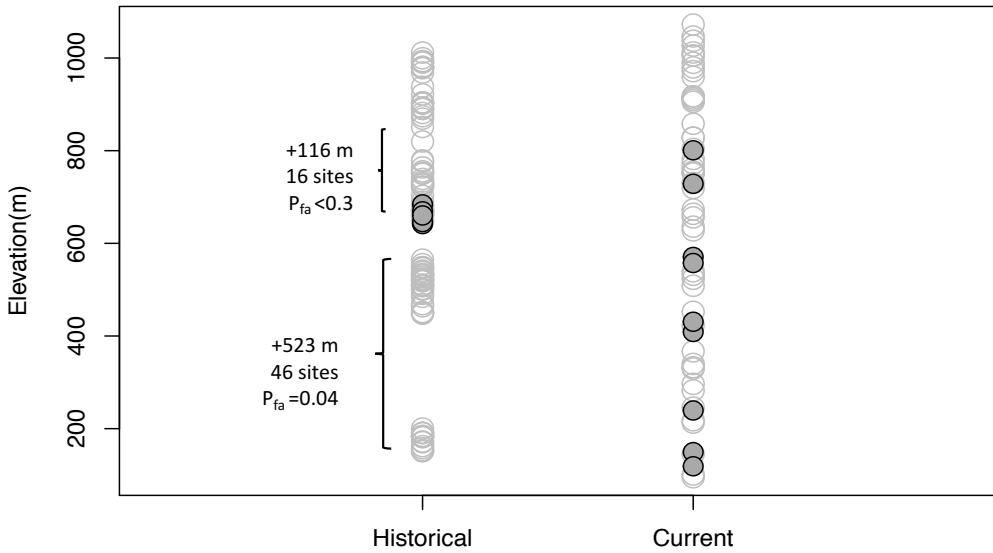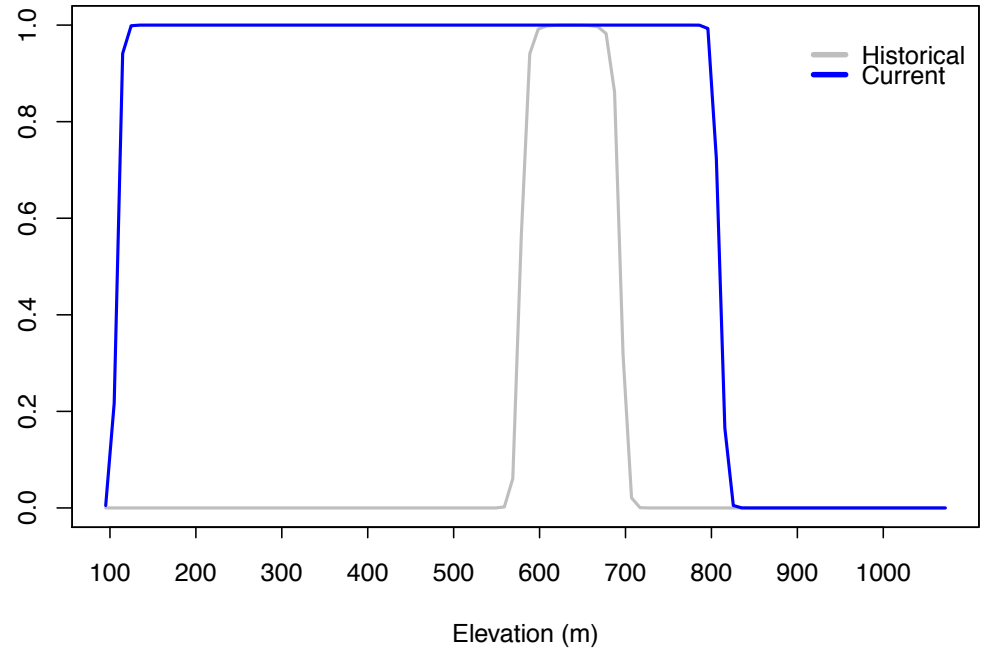

Optimal historical= 608-667 m  
 Optimal modern= 124-785 m

| <b>Occupancy models</b>            | <b>Cumulative AIC weight</b> |
|------------------------------------|------------------------------|
| Constant                           | 0.00                         |
| Elev                               | 0.01                         |
| Elev+Elev <sup>2</sup>             | 0.01                         |
| Era                                | 0.00                         |
| Era+Elev                           | 0.11                         |
| Era+Elev+Elev <sup>2</sup>         | 0.07                         |
| Era*Elev                           | 0.07                         |
| <b>Era*(Elev+Elev<sup>2</sup>)</b> | <b>0.73</b>                  |

K

11 – *Spindalis portoricensis*

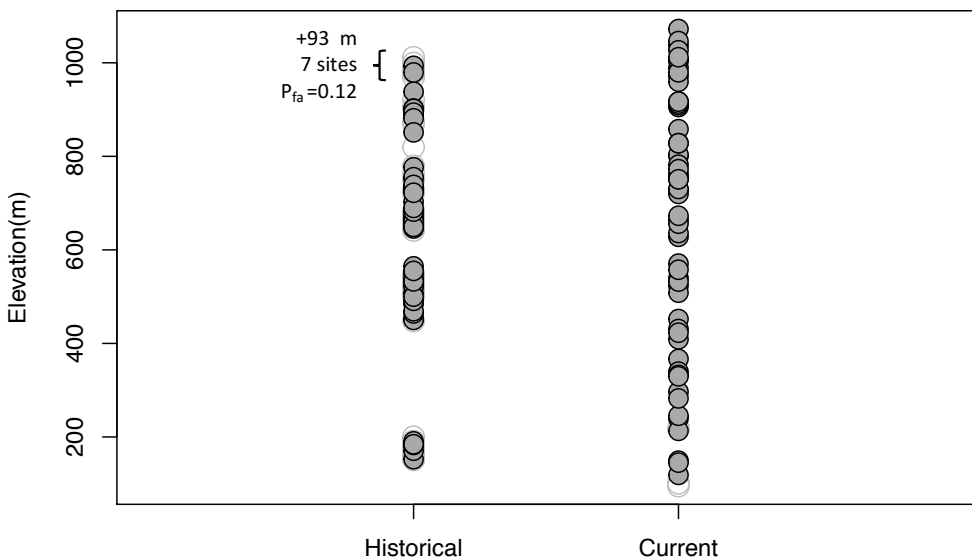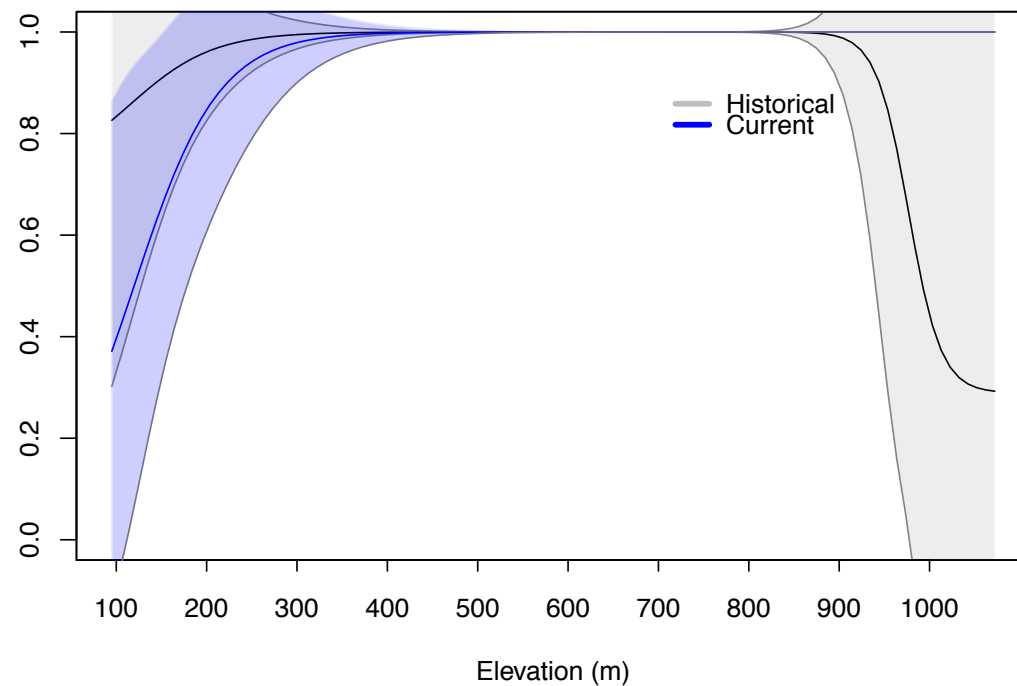

| <u>Occupancy models</u>       | <u>Cumulative AIC weight</u> |
|-------------------------------|------------------------------|
| Constant                      | 0.00                         |
| Elev                          | 0.21                         |
| Elev+Elev <sup>2</sup>        | 0.08                         |
| Era                           | 0.00                         |
| Era+Elev                      | 0.09                         |
| Era+Elev+Elev <sup>2</sup>    | 0.03                         |
| <b>Era*Elev</b>               | <b>0.51</b>                  |
| Era*(Elev+Elev <sup>2</sup> ) | 0.07                         |

Optimal historical= 302-884 m  
 Optimal modern= 371 -1072 m

L

## 12 – *Coccyzus minor*

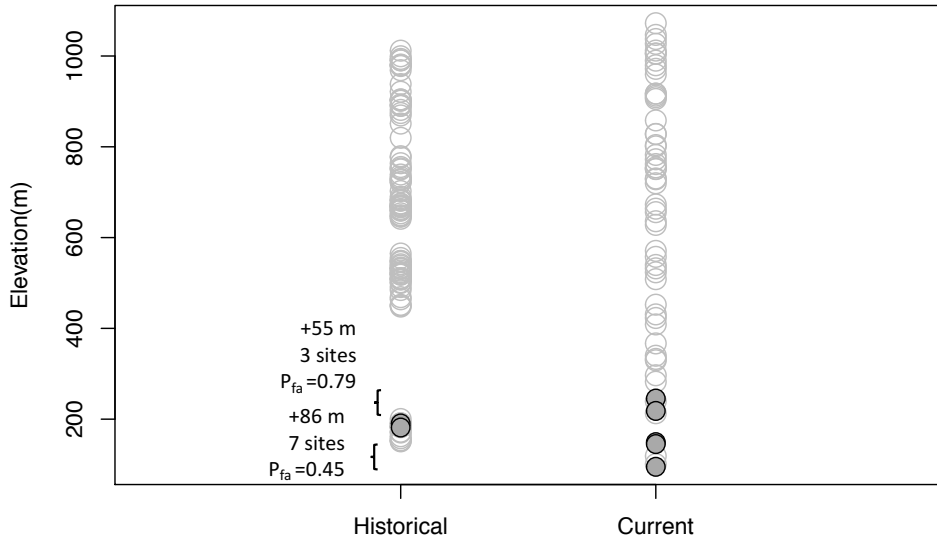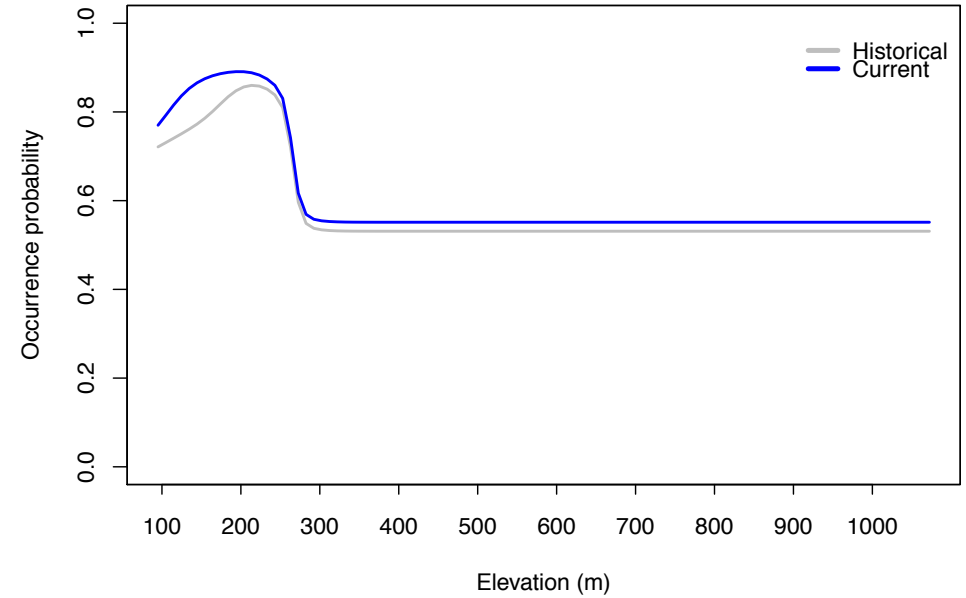

| <u>Occupancy models</u>       | <u>Cumulative AIC weight</u> |
|-------------------------------|------------------------------|
| Constant                      | 0.21                         |
| <b>Elev</b>                   | <b>0.31</b>                  |
| Elev+Elev <sup>2</sup>        | 0.11                         |
| Era                           | 0.09                         |
| Era+Elev                      | 0.14                         |
| Era+Elev+Elev <sup>2</sup>    | 0.05                         |
| Era*Elev                      | 0.08                         |
| Era*(Elev+Elev <sup>2</sup> ) | 0.01                         |

Optimal historical= 213 m  
 Optimal modern= 193 m

**M***13 – Icterus portoricensis*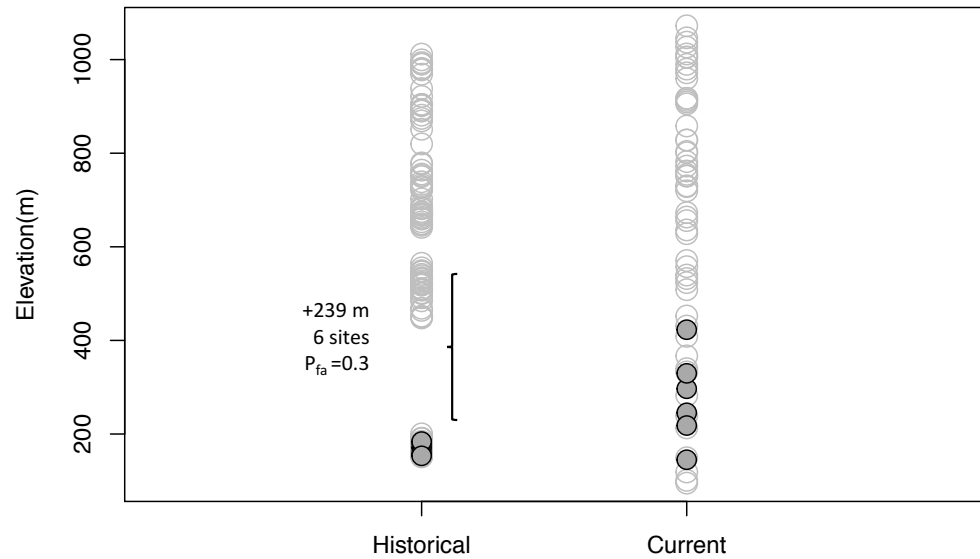

| <b>Occupancy models</b>       | <b>Cumulative AIC weight</b> |
|-------------------------------|------------------------------|
| Constant                      | 0.09                         |
| Elev                          | 0.24                         |
| Elev+Elev <sup>2</sup>        | 0.09                         |
| Era                           | 0.04                         |
| <b>Era+Elev</b>               | <b>0.25</b>                  |
| Era+Elev+Elev <sup>2</sup>    | 0.09                         |
| Era*Elev                      | 0.14                         |
| Era*(Elev+Elev <sup>2</sup> ) | 0.05                         |

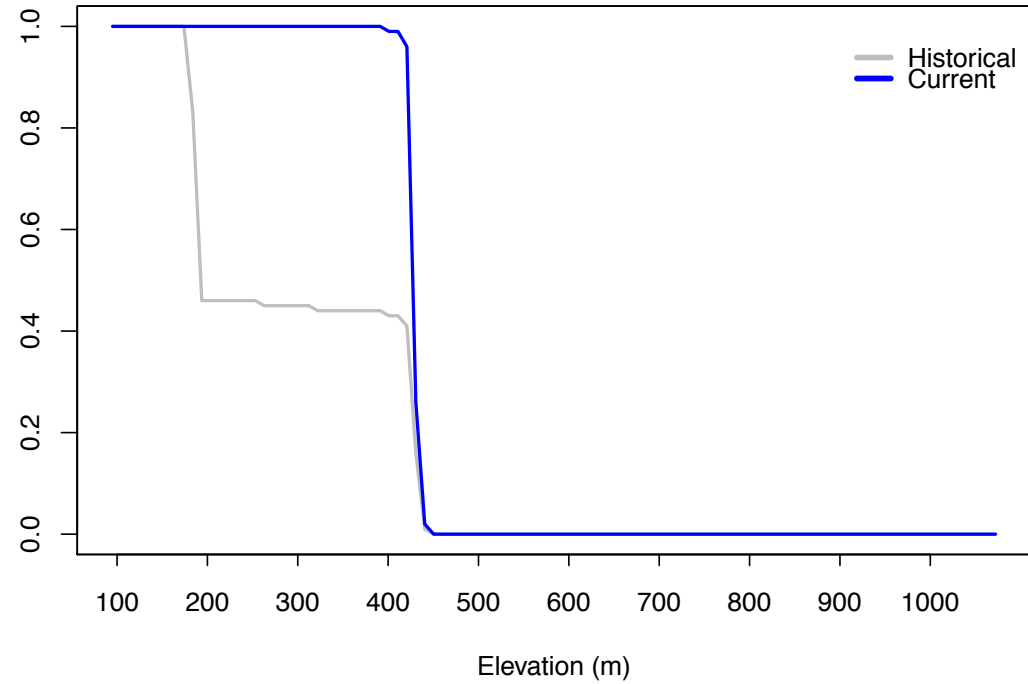

Optimal historical= 95-174 m  
 Optimal modern= 95 - 391 m

N

14 – *Margarops fuscatus*

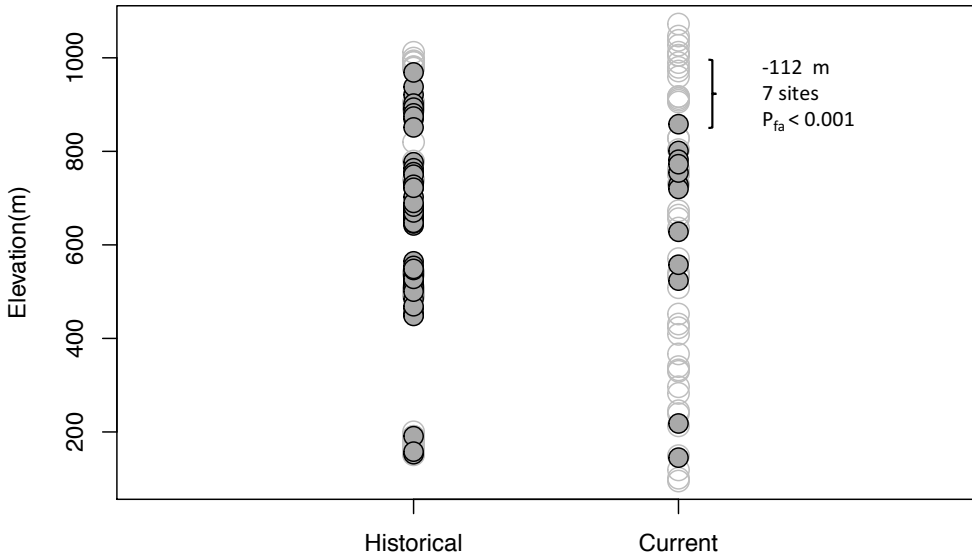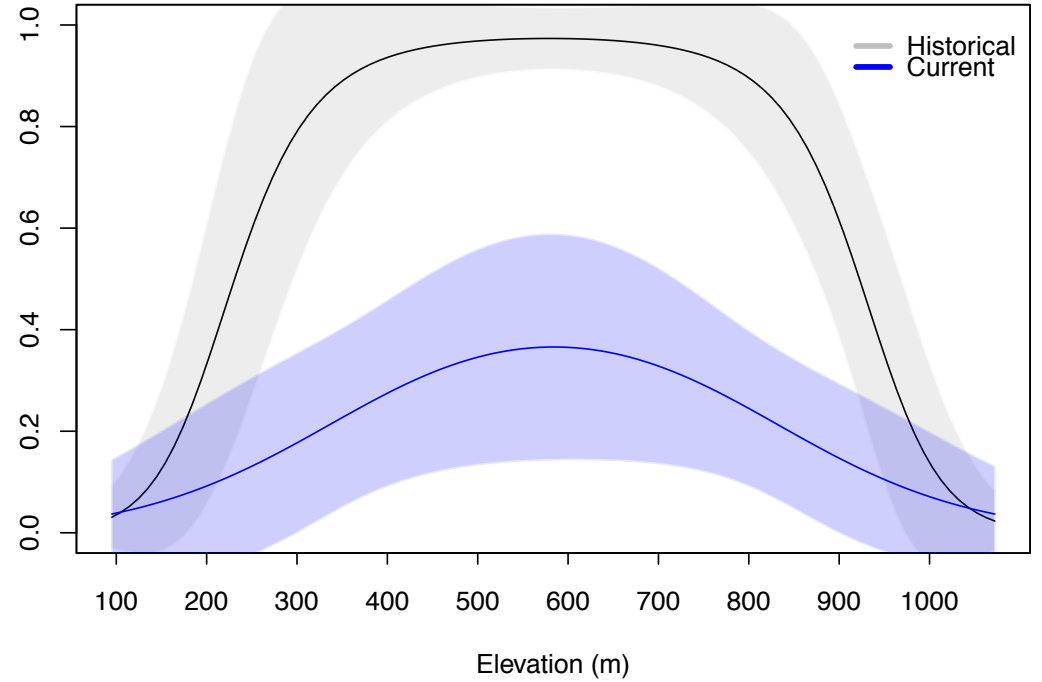

| <u>Occupancy models</u>            | <u>Cumulative AIC weight</u> |
|------------------------------------|------------------------------|
| Constant                           | 0.00                         |
| Elev                               | 0.00                         |
| Elev+Elev <sup>2</sup>             | 0.00                         |
| Era                                | 0.05                         |
| Era+Elev                           | 0.13                         |
| Era+Elev+Elev <sup>2</sup>         | 0.28                         |
| Era*Elev                           | 0.00                         |
| <b>Era*(Elev+Elev<sup>2</sup>)</b> | <b>0.54</b>                  |

Optimal historical= 480 - 677 m  
Optimal modern= 568 - 598 m

O

15 – *Zenaida aurita*

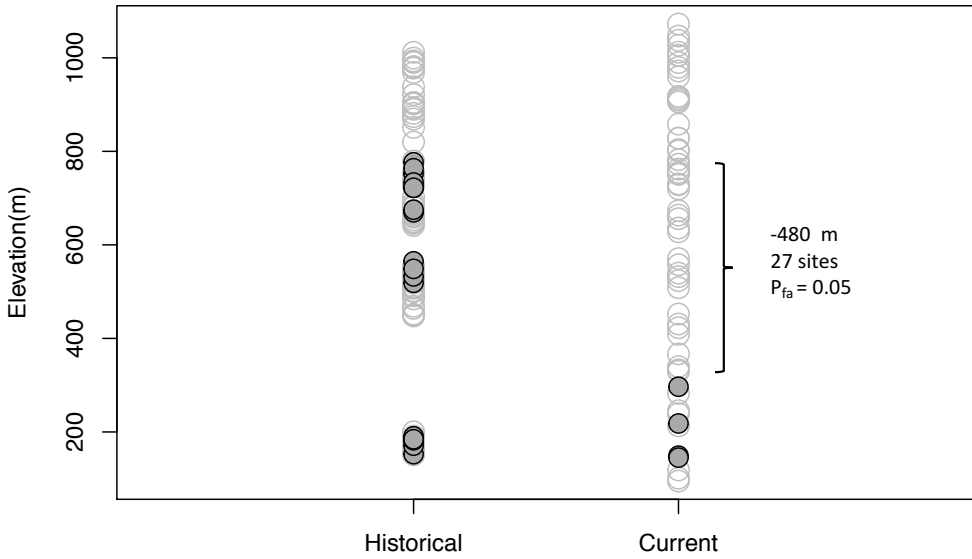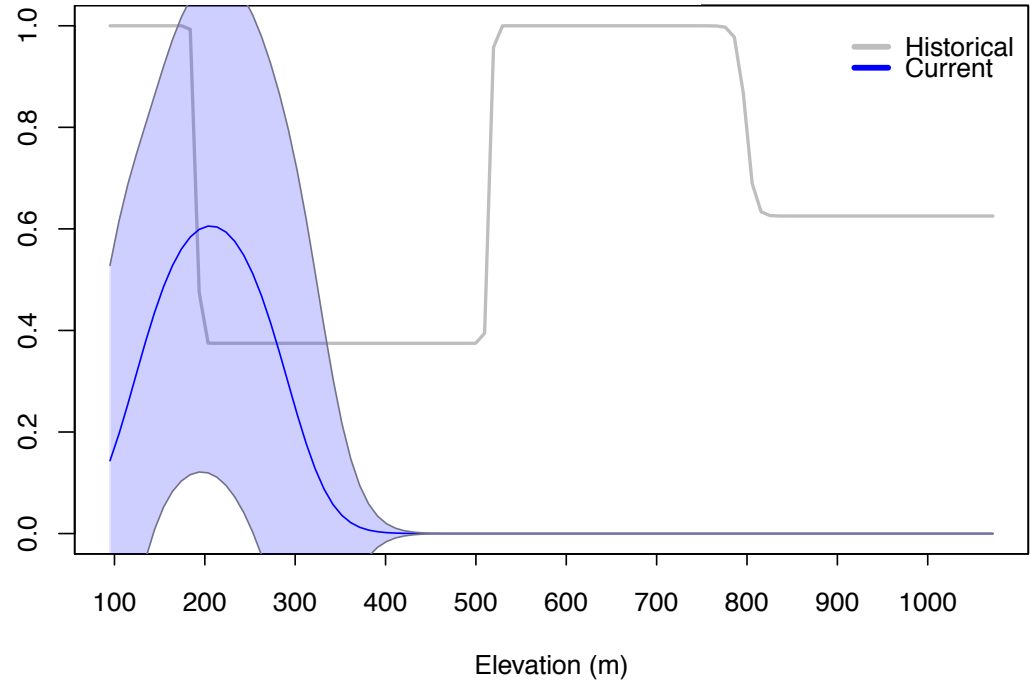

Optimal historical= 95-776 m  
Optimal modern= 203 m

| <u>Occupancy models</u>            | <u>Cumulative AIC weight</u> |
|------------------------------------|------------------------------|
| Constant                           | 0.00                         |
| Elev                               | 0.00                         |
| Elev+Elev <sup>2</sup>             | 0.00                         |
| Era                                | 0.00                         |
| Era+Elev                           | 0.01                         |
| Era+Elev+Elev <sup>2</sup>         | 0.33                         |
| Era*Elev                           | 0.00                         |
| <b>Era*(Elev+Elev<sup>2</sup>)</b> | <b>0.65</b>                  |

**P***16 – Loxigilla portoricensis*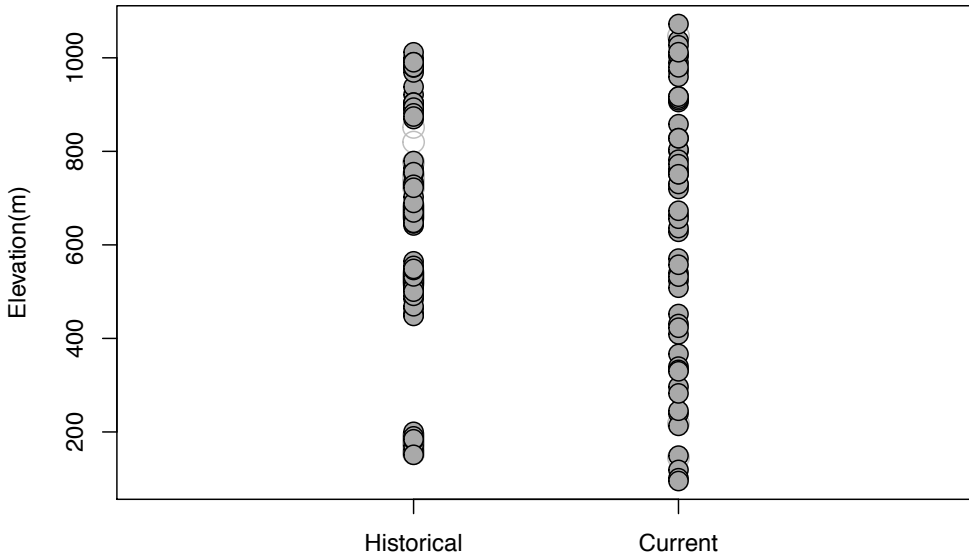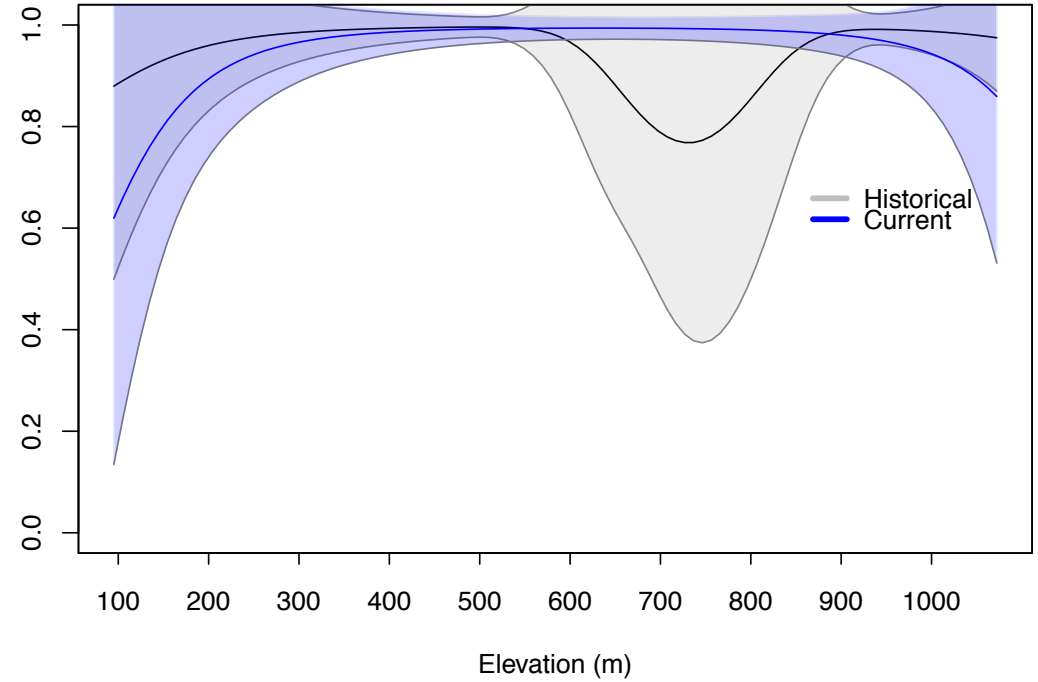

| <b><u>Occupancy models</u></b>     | <b><u>Cumulative AIC weight</u></b> |
|------------------------------------|-------------------------------------|
| Constant                           | 0.12                                |
| Elev                               | 0.13                                |
| Elev+Elev <sup>2</sup>             | 0.17                                |
| Era                                | 0.05                                |
| Era+Elev                           | 0.07                                |
| Era+Elev+Elev <sup>2</sup>         | 0.06                                |
| Era*Elev                           | 0.03                                |
| <b>Era*(Elev+Elev<sup>2</sup>)</b> | <b>0.37</b>                         |

Optimal historical= 450 -529 m  
 Optimal current= 401 - 855m



Q

17 – *Todus mexicanus*

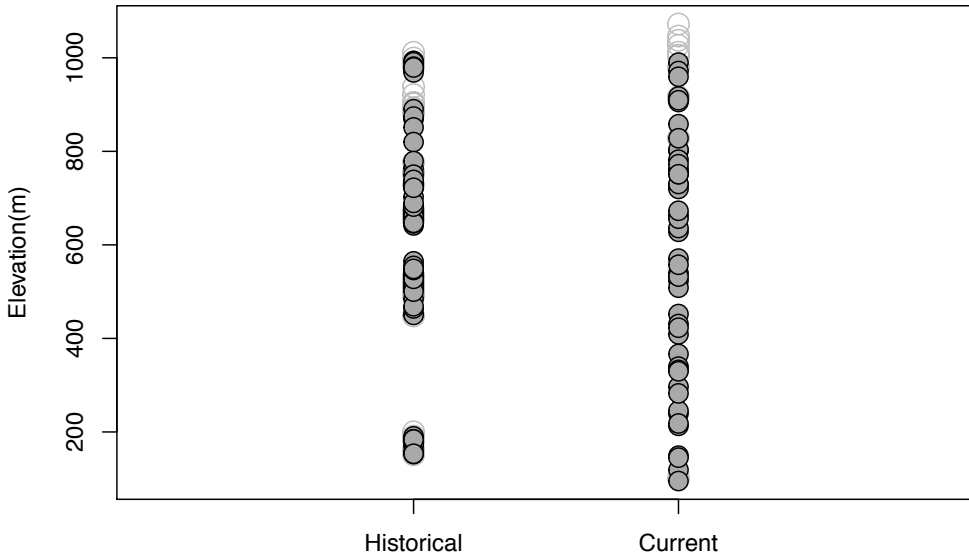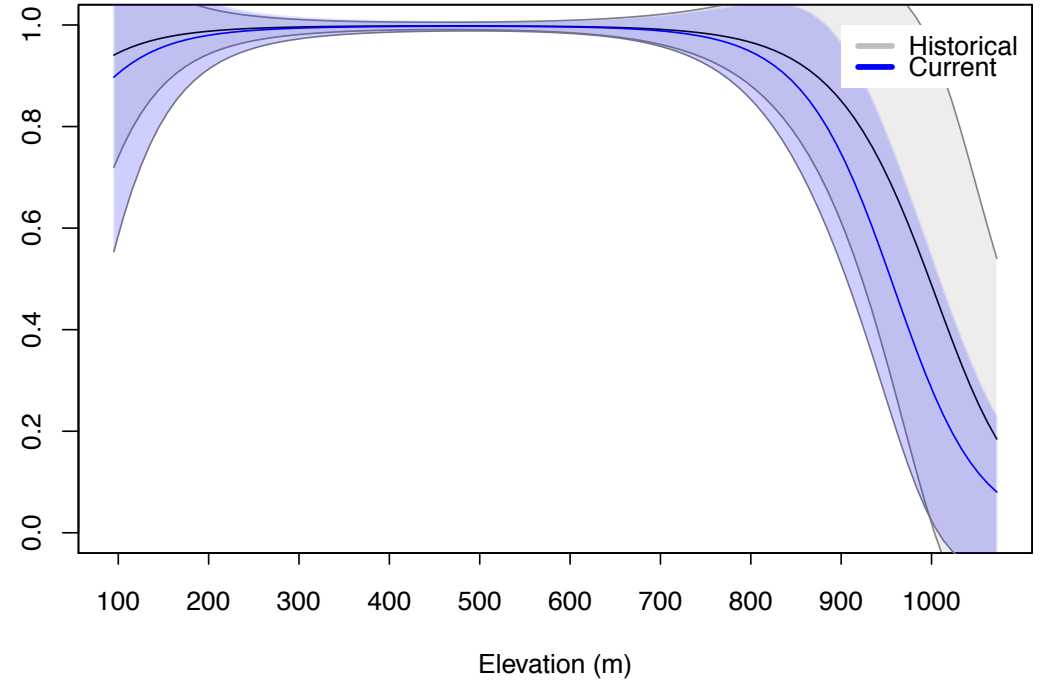

| <u>Occupancy models</u>          | <u>Cumulative AIC weight</u> |
|----------------------------------|------------------------------|
| Constant                         | 0.00                         |
| Elev                             | 0.22                         |
| Elev+Elev <sup>2</sup>           | 0.22                         |
| Era                              | 0.00                         |
| Era+Elev                         | 0.21                         |
| <b>Era+Elev+Elev<sup>2</sup></b> | <b>0.23</b>                  |
| Era*Elev                         | 0.09                         |
| Era*(Elev+Elev <sup>2</sup> )    | 0.04                         |

Optimal historical= 282-647 m  
 Optimal modern= 331- 628 m

R

18 – *Patagioenas squamosa*

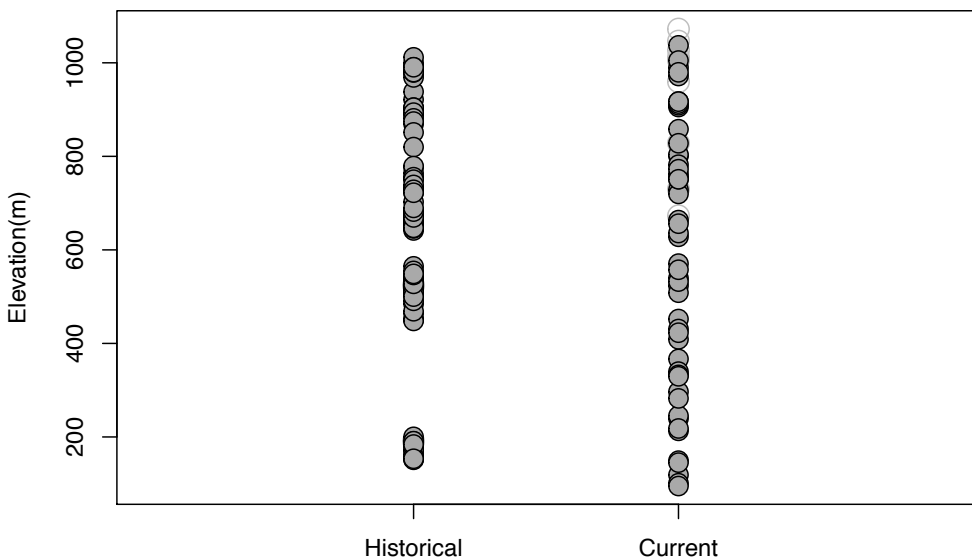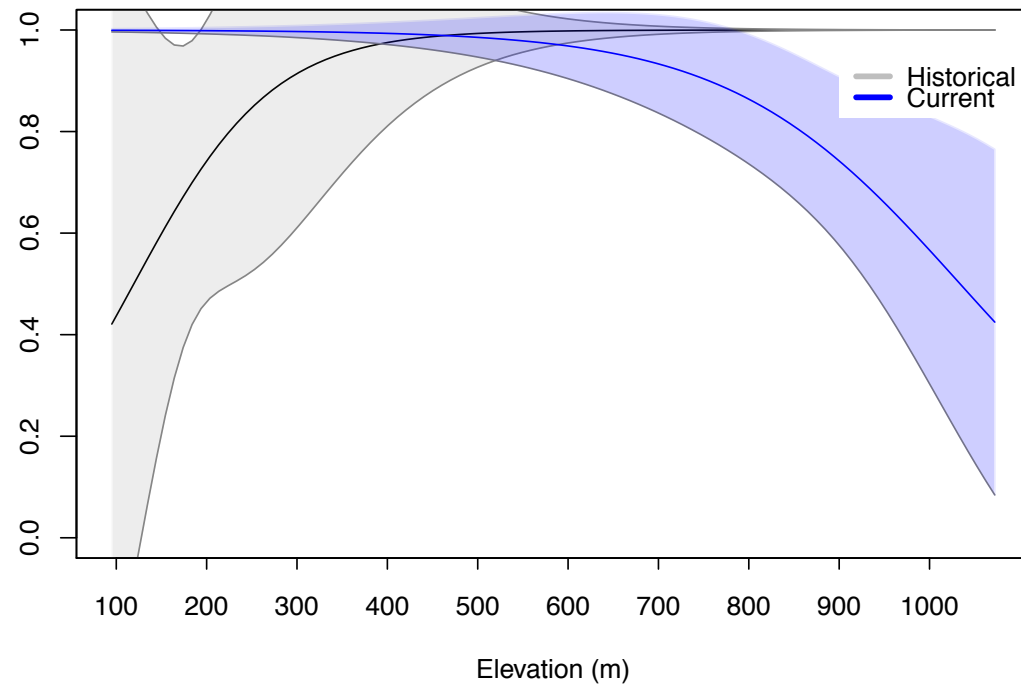

| <u>Occupancy models</u>       | <u>Cumulative AIC weight</u> |
|-------------------------------|------------------------------|
| Constant                      | 0.00                         |
| Elev                          | 0.00                         |
| Elev+Elev <sup>2</sup>        | 0.00                         |
| Era                           | 0.00                         |
| Era+Elev                      | 0.04                         |
| Era+Elev+Elev <sup>2</sup>    | 0.01                         |
| <b>Era*Elev</b>               | <b>0.83</b>                  |
| Era*(Elev+Elev <sup>2</sup> ) | 0.12                         |

Optimal historical= 529-1072 m  
 Optimal modern= 95-371 m

**S***19 – Turdus plumbeus*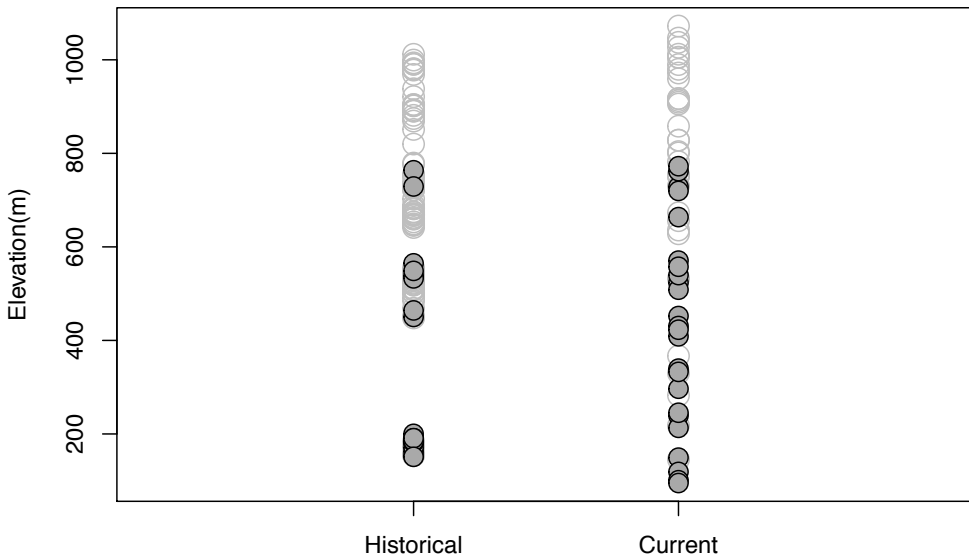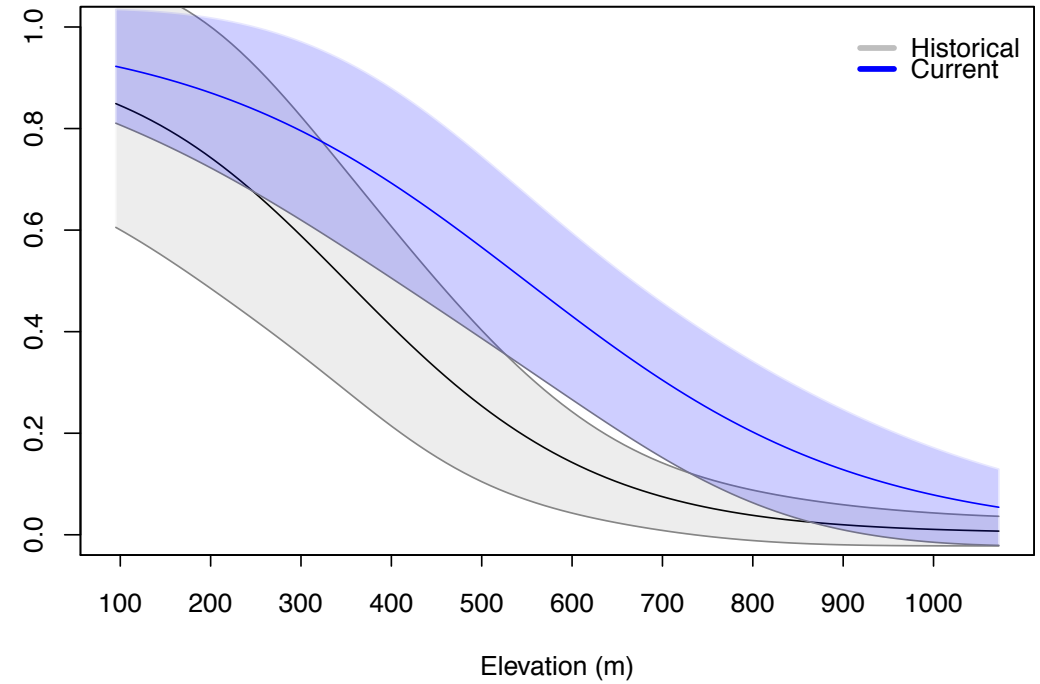

| <u>Occupancy models</u>            | <u>Cumulative AIC weight</u> |
|------------------------------------|------------------------------|
| Constant                           | 0.00                         |
| Elev                               | 0.01                         |
| Elev+Elev <sup>2</sup>             | 0.00                         |
| Era                                | 0.00                         |
| Era+Elev                           | 0.28                         |
| Era+Elev+Elev <sup>2</sup>         | 0.19                         |
| Era*Elev                           | 0.19                         |
| <b>Era*(Elev+Elev<sup>2</sup>)</b> | <b>0.34</b>                  |

Optimal historical= 95 m  
 Optimal modern= 95 m

T

20 – *Tyrannus dominicensis*

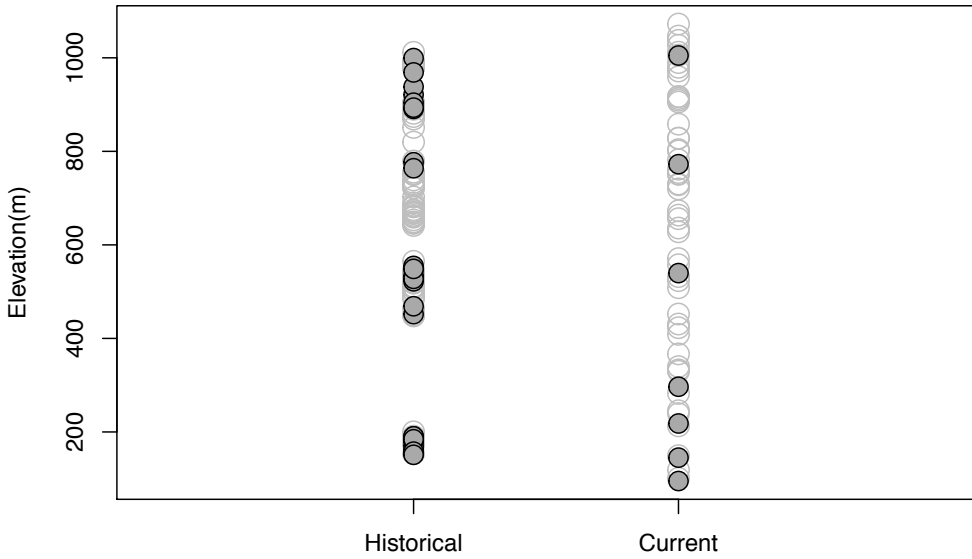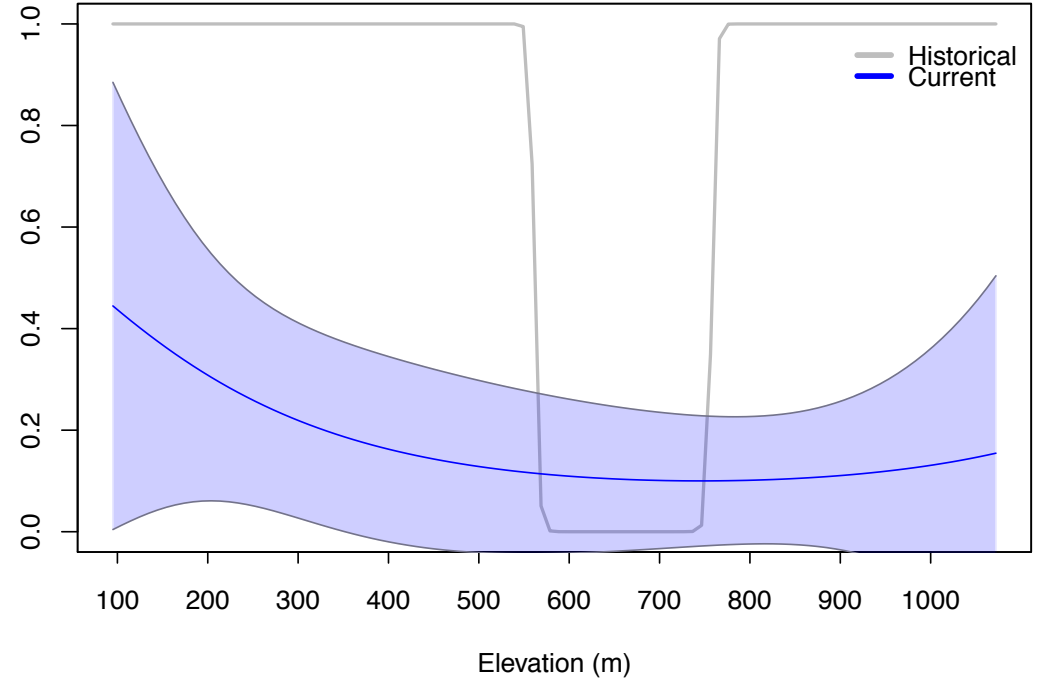

| <u>Occupancy models</u>            | <u>Cumulative AIC weight</u> |
|------------------------------------|------------------------------|
| Constant                           | 0.00                         |
| Elev                               | 0.00                         |
| Elev+Elev <sup>2</sup>             | 0.00                         |
| Era                                | 0.01                         |
| Era+Elev                           | 0.01                         |
| Era+Elev+Elev <sup>2</sup>         | 0.01                         |
| Era*Elev                           | 0.00                         |
| <b>Era*(Elev+Elev<sup>2</sup>)</b> | <b>0.98</b>                  |

Optimal historical= 95 - 1072 m  
 Optimal modern= 95 m

U

21 – *Coereba flaveola*

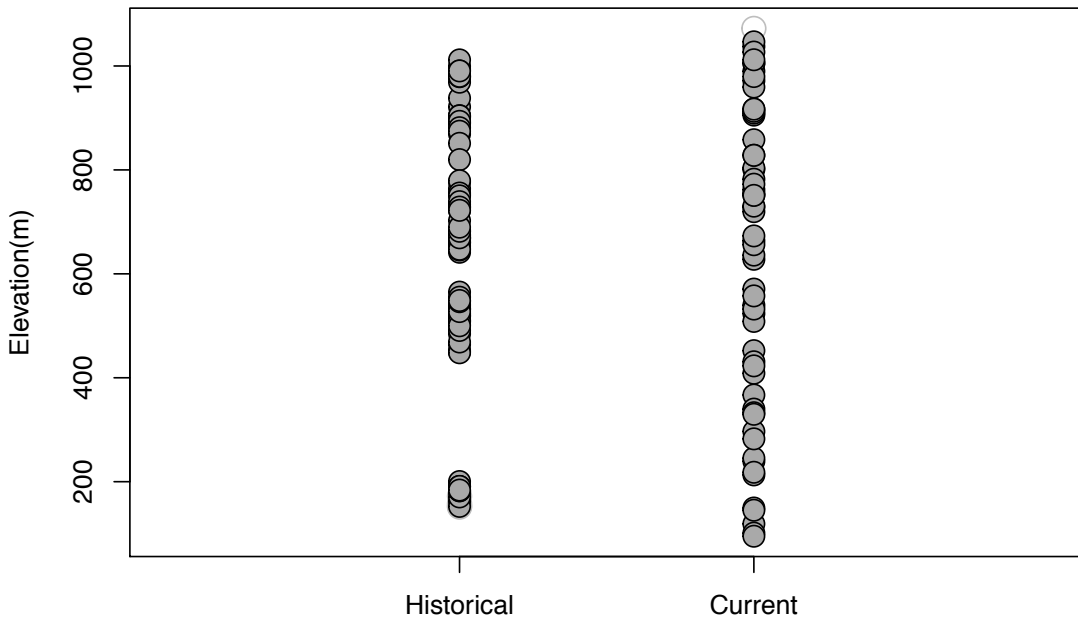

Species not analyzed with occupancy models  
– Detections in all but one site
